# Supplementary material for: The RNA-Binding Protein NELFE Promotes Gastric Cancer Growth and Metastasis Through E2F2
Source: Front Oncol. 2021 Jul 6;11:677111. doi: 10.3389/fonc.2021.677111 (PMC8290256; doi:10.3389/fonc.2021.677111)
Supplement: Supplementary file 5 [file Table_2.xls]

## Sheet: BGCsi_vs_BGCC.gene_DE.signi.add
GeneName	MeanTPM (BGCC)	MeanTPM (BGCsi)		log2FoldChange	pValue	result
ZBTB45P1	11.9077	4.94984	0.415682	-1.26645	1.06e-14	down
EID2	29.3052	11.8581	0.404642	-1.30528	9.54e-28	down
CKMT1B	5.79606	2.80298	0.483601	-1.04811	0.000658521	down
AC018553.1	5.79919	2.47427	0.426657	-1.22885	2.31e-05	down
AL645608.1	11.7056	5.50804	0.470546	-1.08759	1.8e-23	down
BCAM	40.3323	17.7502	0.440099	-1.1841	3.69e-30	down
AC009779.2	7.00961	2.42204	0.345531	-1.53311	2.57e-11	down
PSMB9	98.3476	46.6386	0.474222	-1.07637	1.16e-27	down
FAM78A	7.4384	3.21962	0.432838	-1.2081	1.13e-19	down
PLK1	117.366	50.5493	0.430697	-1.21526	3.54e-41	down
HIST3H2A	14.8023	5.1042	0.344826	-1.53606	4.84e-12	down
SMIM10	48.7107	13.013	0.267149	-1.90428	9.87e-88	down
HIST1H3D	14.0479	6.30393	0.448744	-1.15603	4.55e-10	down
UBQLN2	46.7678	17.0041	0.363586	-1.45963	1.85e-65	down
HOXA11-AS1_2	36.6902	0.216138	0.00589091	-7.40729	2.07e-08	down
AC126564.1	6.04063	2.25422	0.373176	-1.42207	4.21e-11	down
PAQR4	81.8474	29.8061	0.364167	-1.45733	0.000830356	down
NEAT1	63.8325	29.9672	0.469466	-1.09091	4.39e-38	down
PHGDH	17.2814	7.91468	0.457988	-1.12662	3.39e-20	down
AP005329.2	7.17481	2.62355	0.365661	-1.45142	1.1e-12	down
XAGE2	8.90583	2.95853	0.332202	-1.58987	2.58e-05	down
DIAPH3	40.175	19.5454	0.486506	-1.03947	3.59e-35	down
TRIML2	14.907	5.87884	0.394368	-1.34239	3.82e-14	down
OLMALINC	20.8518	10.1346	0.486029	-1.04089	2.1e-18	down
BX664615.1	6.47519	2.90998	0.449405	-1.15391	0.00698376	down
OTUD6B-AS1	15.282	6.59446	0.431518	-1.21251	4.48e-15	down
CHML	62.2546	16.0023	0.257045	-1.95991	1.05e-177	down
AC034231.1	15.7386	6.96698	0.442668	-1.1757	1.86e-06	down
CDK1	136.096	66.3966	0.487865	-1.03545	6.77e-40	down
ZNF488	6.05269	2.94559	0.486658	-1.03902	2.88e-11	down
ARHGAP19	5.27443	2.38962	0.453058	-1.14223	5.63e-11	down
CCNB1	175.096	82.4481	0.470875	-1.08659	3.4e-39	down
TRMT12	8.42726	3.79122	0.449876	-1.1524	5.31e-08	down
YBX2	6.27396	2.95212	0.470535	-1.08763	1.96e-06	down
ZBTB26	10.8882	5.1363	0.471732	-1.08396	9.58e-22	down
SSSCA1-AS1	8.72993	4.04696	0.463573	-1.10913	0.00591032	down
KIF15	18.9615	8.81367	0.46482	-1.10525	6.61e-26	down
ASH1L-AS1	7.62326	2.66248	0.349257	-1.51764	3.3e-07	down
DNAJC9-AS1	10.9261	5.32881	0.487714	-1.03589	5.88e-05	down
SYCE2	6.74694	2.99972	0.444605	-1.1694	7.7e-06	down
AL109615.3	18.6738	9.29865	0.497951	-1.00593	3.98e-07	down
AC018647.2	6.30547	2.83284	0.449268	-1.15435	6.27e-11	down
HIST1H2BH	14.6569	5.89609	0.402273	-1.31375	2.44e-19	down
MIR3936	20.282	5.88474	0.290146	-1.78515	0.000333155	down
TMEM37	13.3036	3.87385	0.291189	-1.77997	6.52e-05	down
KIF11	37.8523	18.2483	0.482092	-1.05262	4.73e-41	down
RABGEF1	5.69834	2.825	0.495759	-1.01229	0.0113424	down
NIFK-AS1	8.88247	2.69243	0.303118	-1.72205	7.91e-12	down
OASL	48.6322	24.0429	0.494382	-1.0163	1.3e-13	down
FNDC10	41.7666	18.0597	0.432397	-1.20957	1.17e-39	down
CASC9	5.7492	1.61644	0.281159	-1.83054	1.62e-05	down
PTPRQ	6.58563	0.675584	0.102585	-3.28511	4.25e-37	down
PBK	45.3401	21.4839	0.473839	-1.07753	1.2e-17	down
CCL26	5.43874	1.64142	0.301803	-1.72832	0.00170928	down
HIST2H4A	60.7612	29.5048	0.485586	-1.0422	2.61e-13	down
RYR1	5.58845	2.61554	0.468026	-1.09534	4.64e-13	down
MAGEF1	46.3235	21.2854	0.459496	-1.12188	1.89e-31	down
DEPDC1	25.0572	10.8634	0.433544	-1.20575	3.19e-20	down
C8orf4	7.59887	1.29016	0.169783	-2.55824	5.2e-25	down
CCDC71	23.7291	11.3424	0.477996	-1.06493	2.22e-23	down
PBX3	10.5229	3.4352	0.326449	-1.61507	0.000108361	down
SNRPD1	27.9426	13.6869	0.489821	-1.02967	4.37e-05	down
MCM3	190.966	94.388	0.494266	-1.01664	2.84e-61	down
SPC25	26.59	10.4922	0.394592	-1.34157	4.97e-24	down
RRM2	93.8974	44.5255	0.474193	-1.07645	6.06e-50	down
H2AFX	112.376	47.2701	0.420643	-1.24933	3.9e-75	down
AC087388.1	8.43642	3.18054	0.377001	-1.40736	6.1e-09	down
VEPH1	9.49403	3.95026	0.416079	-1.26507	2.52e-12	down
SDHAF1	17.2228	6.2697	0.364036	-1.45785	3.41e-16	down
HIST1H4I	15.6132	4.80808	0.30795	-1.69923	2.63e-22	down
KRT18	792.746	351.623	0.443551	-1.17283	2.2e-98	down
AC245041.2	98.5847	43.1122	0.437311	-1.19327	3.6e-15	down
DDX60	10.6262	5.01439	0.471889	-1.08348	1.08e-27	down
AL162258.1	39.5051	18.4085	0.465978	-1.10167	3.64e-05	down
CCNG2	13.2701	5.27611	0.397593	-1.33064	1.05e-07	down
VAPA	88.8107	33.445	0.376587	-1.40894	1.74e-15	down
CEP55	49.0256	23.9798	0.489128	-1.03171	2.75e-42	down
FZD7	5.37428	2.45434	0.456683	-1.13074	3.36e-08	down
HSD11B2	8.69358	3.98149	0.457981	-1.12664	6.95e-09	down
SMIM12	29.1751	13.7295	0.47059	-1.08746	1.05e-05	down
HCG11	12.9846	5.65304	0.435366	-1.1997	1.53e-22	down
BORCS6	13.6489	6.71018	0.491626	-1.02437	1.97e-18	down
AL358472.4	11.3269	4.65037	0.41056	-1.28433	1.63e-06	down
ZDHHC23	10.334	5.00545	0.484367	-1.04583	5.29e-05	down
TOB1-AS1	5.73336	2.7755	0.484097	-1.04663	0.000716259	down
CIT	22.2713	8.92164	0.400589	-1.3198	2.47e-39	down
TCAM1P	18.3152	6.22085	0.339654	-1.55786	5.8e-05	down
KIF20A	84.2113	36.8678	0.437801	-1.19165	3.87e-65	down
AC005332.7	7.49695	3.00641	0.401018	-1.31826	7.08e-12	down
SCIN	7.22323	2.86709	0.396927	-1.33305	4.03e-09	down
PTOV1-AS1	13.1125	6.35217	0.484438	-1.04562	2.82e-12	down
CCNA2	69.7687	26.5232	0.380159	-1.39532	1.45e-50	down
NRGN	6.95519	3.17328	0.456247	-1.13211	3.57e-06	down
XRCC1	55.5112	27.1838	0.489699	-1.03003	1.78e-15	down
NEDD8-MDP1	5.9978	1.23737	0.206305	-2.27715	0.000647836	down
CCAT1	51.9675	21.9871	0.423094	-1.24095	3.91e-49	down
FLJ37453	6.23623	2.76517	0.443404	-1.17331	5.1e-05	down
AC012306.2	14.1166	6.50649	0.460911	-1.11744	2.53e-06	down
WDR5B	7.73359	3.81647	0.493492	-1.0189	2.06e-13	down
HIST1H2AG	17.476	5.65616	0.323653	-1.62748	9.99e-33	down
PRR11	75.7772	36.3627	0.479864	-1.0593	3.41e-19	down
GSG1L2	5.25652	1.90122	0.361689	-1.46718	0.000144828	down
HMGB2	206.318	94.7385	0.459187	-1.12285	3.91e-59	down
CSTF2T	32.6736	16.3236	0.499596	-1.00117	4.5e-42	down
SPC24	29.7813	14.3443	0.481656	-1.05393	1.04e-10	down
MKI67	81.8628	40.2998	0.492285	-1.02244	3.2e-55	down
FSBP	8.03788	3.5022	0.435712	-1.19855	4.78e-08	down
MYC	16.4042	7.761	0.473111	-1.07975	0.000961505	down
NCAPG	36.0194	17.1333	0.475669	-1.07197	1.61e-45	down
PTTG1	245.097	116.136	0.473838	-1.07753	1.36e-48	down
MARS2	7.52419	3.50661	0.466044	-1.10146	3.41e-11	down
SAMD11	117.628	58.2218	0.494964	-1.01461	2.03e-51	down
TSPYL4	17.6479	6.97866	0.395439	-1.33847	5.84e-43	down
AL021807.1	7.10666	3.41753	0.480892	-1.05622	0.00231013	down
AP002360.1	6.68927	2.20347	0.329404	-1.60207	2.6e-15	down
CCL5	40.9624	8.07707	0.197182	-2.3424	7.57e-55	down
BUB1B	56.7837	24.8111	0.43694	-1.19449	1.66e-30	down
TK1	149.474	66.016	0.441655	-1.17901	1.86e-33	down
H2BFS	8.6548	1.41093	0.163023	-2.61685	1.27e-09	down
DNMT3B	10.6738	4.56738	0.427906	-1.22463	2.65e-17	down
FGFR4	26.0287	11.9173	0.457854	-1.12704	1.03e-20	down
AL645933.2	7.88407	3.23544	0.410377	-1.28498	1.18e-08	down
AL162595.1	9.76391	4.46379	0.457173	-1.12919	0.0108441	down
LINC01123	20.9796	8.12859	0.387453	-1.36791	5.03e-24	down
RRS1	38.687	18.383	0.475174	-1.07347	1.11e-28	down
CKS2	320.092	135.046	0.421898	-1.24503	1.97e-73	down
TBX1	118.265	48.0486	0.406278	-1.29946	1.08e-52	down
HIST1H3G	8.76873	4.05545	0.46249	-1.11251	5.43e-13	down
AC015813.5	11.3649	4.72341	0.415615	-1.26668	8.04e-10	down
AC099811.2	13.1283	5.49121	0.418274	-1.25748	0.00362814	down
AC004449.1	8.90579	3.05314	0.342826	-1.54445	1.3e-05	down
FAHD1	45.3842	18.8268	0.414831	-1.2694	5.01e-43	down
OLR1	17.7032	3.07511	0.173703	-2.5253	8.71e-47	down
AL050341.2	7.89657	3.56751	0.451779	-1.14631	7.36e-07	down
AC011603.3	481.342	237.014	0.492403	-1.02209	6.15e-16	down
STEAP4	21.7268	8.60324	0.395975	-1.33652	4.04e-17	down
RNA5SP18	9.85073	2.51561	0.255373	-1.96932	0.00385837	down
KDM8	5.84613	2.922	0.499818	-1.00053	0.000500138	down
NEK2	59.6121	29.6255	0.49697	-1.00877	1.69e-43	down
NORAD	183.402	84.9114	0.462978	-1.11098	6.97e-68	down
FIRRE	5.51999	2.60194	0.471366	-1.08508	6.72e-08	down
HNRNPUL2	64.1133	31.2774	0.487845	-1.0355	1.89e-55	down
LINC00526	8.53147	4.20601	0.492999	-1.02034	3.97e-07	down
LINC00847	5.07827	2.40426	0.473441	-1.07874	0.000112828	down
LCMT2	10.4257	4.97403	0.477094	-1.06765	1.07e-20	down
ANO2	27.7795	7.71047	0.277559	-1.84913	3.65e-46	down
HIST2H2BE	28.5397	13.5251	0.473906	-1.07733	2.92e-30	down
KIAA1524	38.6685	19.0653	0.493044	-1.02021	2.45e-35	down
BIRC5	87.7591	32.112	0.365911	-1.45043	1.4e-13	down
HIST1H2BK	692.842	174.312	0.25159	-1.99085	4.14e-153	down
AC245041.3	74.6937	33.9624	0.454689	-1.13705	5.63e-63	down
TSEN15	37.1014	17.9622	0.484137	-1.04651	0.000406496	down
PTMAP4	15.5776	7.29361	0.468211	-1.09477	0.000303343	down
MYLK3	12.2922	4.36073	0.354756	-1.4951	6.71e-57	down
TRAM2-AS1	7.24532	3.26555	0.450711	-1.14973	0.00953001	down
SAA1	22.538	4.73726	0.21019	-2.25023	1.97e-26	down
HMMR	37.9511	17.1511	0.451925	-1.14584	2.14e-13	down
TINAGL1	42.5315	13.5603	0.31883	-1.64914	6.72e-63	down
RARRES3	14.8146	6.73753	0.45479	-1.13673	8.41e-08	down
TCOF1	55.6365	27.7821	0.49935	-1.00188	9.27e-41	down
HIST1H2BJ	38.9373	16.5712	0.425587	-1.23247	4.91e-08	down
ZBED8	6.2859	3.09294	0.492044	-1.02314	1.42e-09	down
KCNQ2	6.48569	3.10761	0.47915	-1.06145	0.000141055	down
PIR	67.8421	25.206	0.37154	-1.42841	4.62e-39	down
WDR89	8.72024	4.1018	0.470377	-1.08811	6.4e-08	down
ZBTB45P2	17.2799	7.47386	0.432517	-1.20917	5.5e-21	down
HPDL	59.4285	21.3057	0.35851	-1.47992	6.37e-48	down
HIST1H2BF	5.72533	2.67496	0.467215	-1.09784	6.07e-05	down
TMEM203	61.6302	30.2423	0.490705	-1.02707	9.19e-28	down
SKA1	12.7078	6.21818	0.48932	-1.03115	1.21e-14	down
STIL	29.9665	12.1259	0.404649	-1.30526	7.65e-35	down
RMI2	27.2359	8.12018	0.298142	-1.74593	2.3e-37	down
PIF1	38.1301	18.0947	0.474553	-1.07536	1.64e-19	down
HIST1H3D	21.7142	10.7533	0.49522	-1.01386	4.57e-06	down
TUBA1B	1705.23	715.983	0.419876	-1.25197	9.93e-09	down
E2F2	16.6985	5.39446	0.323051	-1.63017	1.59e-35	down
FBXO5	35.938	17.2411	0.479746	-1.05966	1.66e-23	down
SPIN4	7.52297	3.19166	0.424255	-1.237	2.18e-14	down
AC005696.1	7.2871	2.23853	0.307191	-1.70279	6.31e-05	down
DLGAP5	40.6693	18.5269	0.455549	-1.13432	1.65e-53	down
LHX6	11.7995	5.79759	0.49134	-1.02521	0.000190798	down
LIFR-AS1	5.28329	2.25331	0.426496	-1.22939	1.47e-13	down
NDC80	76.1748	29.1289	0.382396	-1.38686	7.6e-54	down
BX322639.1	6.00126	2.84107	0.473413	-1.07883	3.03e-13	down
CDCA3	42.6124	20.7881	0.487842	-1.03552	9.43e-13	down
LINC01106	13.3076	6.59844	0.49584	-1.01205	2.95e-12	down
TOP2A	110.245	46.9345	0.425729	-1.23199	2.19e-103	down
HIST1H2BO	13.8859	4.35488	0.313619	-1.67292	5.34e-05	down
RAD54L	27.0509	12.1742	0.450047	-1.15185	4.68e-17	down
SEMA6D	6.17989	2.79647	0.452511	-1.14397	6.82e-06	down
KIF4A	41.3414	19.6733	0.475875	-1.07135	1.25e-28	down
CKAP2L	28.1841	13.7447	0.487675	-1.03601	2.31e-19	down
MND1	20.477	8.96465	0.43779	-1.19169	7.95e-11	down
CHST13	5.21054	2.59584	0.49819	-1.00523	1.68e-06	down
APOBEC3B	24.7951	10.0189	0.404066	-1.30734	2.65e-28	down
SRXN1	66.4428	31.999	0.481602	-1.05409	8.86e-49	down
NRARP	53.45	21.602	0.404154	-1.30702	3.99e-38	down
HIST1H2BG	11.0705	4.87916	0.440735	-1.18202	9.7e-11	down
GAS1	9.47661	2.51858	0.265768	-1.91176	1.97e-27	down
EIF3J-AS1	14.0936	6.74192	0.478369	-1.0638	7.4e-09	down
XRCC2	28.1173	12.8226	0.45604	-1.13277	1.39e-34	down
MYBL2	182.168	71.2609	0.391181	-1.35409	6.12e-134	down
EXO1	50.2832	24.5815	0.488862	-1.0325	6.06e-33	down
NEIL3	10.8118	4.52015	0.418077	-1.25816	1.4e-16	down
AIF1L	13.239	3.46838	0.261982	-1.93246	3.62e-05	down
ATXN7L3B	26.3704	9.30538	0.352872	-1.50278	1.21e-112	down
CFAP157	7.03489	3.28026	0.466285	-1.10072	9.19e-12	down
PCLAF	44.157	20.7845	0.470695	-1.08713	1.21e-17	down
IL6	23.8129	8.6882	0.364853	-1.45461	2.53e-14	down
CU639417.1	6.77909	1.34807	0.198857	-2.33019	5.45e-07	down
AL358472.3	8.67137	3.87948	0.447389	-1.1604	0.00157723	down
TRIM69	7.70849	3.18693	0.413432	-1.27428	1.24e-12	down
AC239868.3	6.4407	2.82294	0.438297	-1.19002	1.08e-06	down
NCBP2-AS2	27.7223	13.0873	0.472083	-1.08289	2.93e-13	down
AC138028.6	6.65876	1.54786	0.232455	-2.10498	3.34e-16	down
AL022238.4	5.26807	0.863399	0.163893	-2.60918	8.45e-05	down
EPCAM	8.26368	4.06029	0.491341	-1.0252	8.37e-05	down
HMGN2P5	7.8572	3.03207	0.385896	-1.37371	0.00342814	down
EFCAB13	6.06737	2.9011	0.478148	-1.06447	0.0143914	down
AC016394.1	15.764	6.96602	0.441895	-1.17823	1.15e-08	down
NELFE	128.809	36.8547	0.286118	-1.80532	2.06e-83	down
CDK5RAP2	53.7084	26.4612	0.492683	-1.02127	4.27e-68	down
LINC00473	195.025	90.6043	0.464578	-1.10601	1.54e-77	down
AC016065.1	9.1905	4.06866	0.442703	-1.17559	0.000177645	down
E2F8	12.4562	4.57931	0.367632	-1.44367	2.44e-26	down
C6orf47	24.5744	11.5615	0.470468	-1.08783	8.36e-26	down
AL645608.8	6.07573	2.73829	0.450693	-1.14978	3.92e-07	down
CDC20	175.395	84.3783	0.481075	-1.05567	1.38e-43	down
AC138894.1	5.37709	2.66507	0.495635	-1.01265	0.00231334	down
HIST1H2AI	11.4771	3.37501	0.294064	-1.7658	1.02e-07	down
ESCO2	13.2204	4.76546	0.360461	-1.47208	4.36e-20	down
HIST1H3H	9.62796	4.77185	0.495624	-1.01268	3.29e-06	down
AC093157.1	12.9811	5.32651	0.410328	-1.28515	3.24e-10	down
AC004870.2	14.3991	5.83691	0.405365	-1.3027	1.13e-07	down
ATOH8	15.2122	7.60204	0.499733	-1.00077	6.21e-13	down
CENPE	19.3393	8.24301	0.426231	-1.23029	2.93e-27	down
PAPLN	5.05068	1.64506	0.32571	-1.61834	6.37e-20	down
SERPINE2	11.872	26.7063	2.24953	1.16962	1.52e-19	up
AC000123.2	2.60838	10.7014	4.10271	2.03658	2.34e-09	up
GDF15	125.111	729.109	5.82771	2.54293	0	up
CATSPER1	3.59129	7.46518	2.07869	1.05568	5.68e-06	up
PNPLA7	2.27773	5.22567	2.29424	1.19802	3.31e-14	up
SEC22A	10.0851	23.8677	2.36664	1.24284	0.00521622	up
AL359921.2	3.6419	12.1305	3.33081	1.73587	4.14e-10	up
SYTL1	0.903215	5.27061	5.83538	2.54483	5.27e-11	up
AC012254.2	0.973004	7.1481	7.34642	2.87704	0.000383118	up
SNORD3A	1.45109	6.90372	4.75762	2.25024	0.00220669	up
FER1L4	2.46537	6.01768	2.44089	1.28741	2.44e-08	up
ZG16B	6.55739	16.9229	2.58074	1.36779	2.09e-08	up
HTR1D	5.21198	11.205	2.14985	1.10424	7.73e-15	up
IFITM10	2.94842	9.2367	3.13276	1.64744	3.55e-13	up
C20orf196	2.56295	6.2525	2.43958	1.28663	0.000402259	up
POLD4	35.149	72.4295	2.06064	1.0431	8.82e-24	up
AC132872.4	7.14339	20.2798	2.83896	1.50536	4.07e-48	up
FP565324.1	3.04303	7.83941	2.57619	1.36524	0.00129363	up
LIF	27.3476	67.4261	2.46552	1.30189	1.02e-88	up
FRRS1	3.91792	8.37931	2.13871	1.09674	1.6e-07	up
ALOX5	4.62603	12.9766	2.80513	1.48807	9.66e-15	up
AC093484.5	3.48109	7.04209	2.02296	1.01647	0.0119	up
LINC-PINT	10.851	33.5971	3.09622	1.63051	5.63e-27	up
EHD2	41.8168	101.906	2.43695	1.28508	8.94e-06	up
KCNMB3	2.08195	5.44923	2.61737	1.38812	1.05e-06	up
LINC01537	2.71147	6.95155	2.56376	1.35826	4.13e-15	up
PMEPA1	10.3456	22.8308	2.2068	1.14196	5.05e-17	up
AC139795.2	3.82741	8.92502	2.33187	1.22149	4.23e-07	up
SESN2	12.8421	29.2324	2.27629	1.18668	1.28e-30	up
AQP1	3.33285	8.08776	2.42668	1.27898	3.34e-12	up
FAS	9.48725	27.443	2.89262	1.53237	1.39e-13	up
ORAI3	9.93964	21.0077	2.11353	1.07965	4.59e-15	up
LRRC75A-AS1	182.222	370.288	2.03207	1.02295	2.82e-81	up
TIGAR	11.1284	38.8905	3.4947	1.80517	1.37e-50	up
AC092757.2	3.91758	8.77185	2.2391	1.16292	4.82e-05	up
AEN	30.0673	64.9858	2.16135	1.11193	1.34e-68	up
C15orf52	27.2905	62.1433	2.27711	1.1872	9.39e-72	up
MT-TL1	1468.36	2946.62	2.00675	1.00486	6.93e-56	up
DUSP14	24.564	54.2906	2.21017	1.14416	6.39e-49	up
MIR22HG	11.868	27.101	2.28354	1.19127	2.81e-08	up
THSD1	1.69235	5.51269	3.25742	1.70373	2.11e-20	up
MYEOV	24.3512	54.6255	2.24323	1.16558	2.27e-09	up
RAPGEF3	5.71298	13.3773	2.34156	1.22747	1.09e-17	up
SAR1A	64.3276	131.642	2.04643	1.03311	5.29e-24	up
TP53INP2	4.93265	10.7733	2.18409	1.12703	3.23e-21	up
GAS6-AS1	3.61792	10.7216	2.96348	1.56729	1.38e-60	up
SH3BP5-AS1	12.2595	28.9805	2.36392	1.24118	2.94e-32	up
RUNX1	8.64947	17.9212	2.07194	1.05098	2e-08	up
COL20A1	0.0407697	8.25389	202.452	7.66143	7.71e-62	up
CA12	4.59567	9.30719	2.02521	1.01807	3.32e-18	up
MT-TM	37.5436	124.453	3.31488	1.72896	3.24e-14	up
HNRNPUL2-BSCL2	2.3504	5.5862	2.37671	1.24896	0.000279932	up
MT-TI	73.8473	149.582	2.02555	1.01832	1.42e-08	up
AC132872.3	8.65939	20.2199	2.33503	1.22344	4.32e-07	up
AP001992.1	3.8669	19.1362	4.94872	2.30705	4.34e-23	up
RMRP	4.2355	13.601	3.2112	1.68311	0.000441196	up
SLC10A3	17.4323	36.127	2.07241	1.05131	3.96e-18	up
CMTM3	3.10741	7.42389	2.38909	1.25646	0.000753885	up
LINC01588	1.95653	6.13596	3.13615	1.64899	1.04e-05	up
SERPINB5	2.43742	9.78561	4.01474	2.00531	8.34e-25	up
LSMEM2	1.36953	7.60317	5.55165	2.47292	1.97e-28	up
AC139100.2	2.24024	6.50149	2.90214	1.53712	0.000253241	up
ADGRB2	19.4659	39.4959	2.02898	1.02076	5.15e-31	up
HBE1	10.2314	24.0027	2.34597	1.23018	7.22e-12	up
GLTPD2	15.0099	31.3246	2.08693	1.06139	1.06e-10	up
TNKS1BP1	131.183	277.513	2.11547	1.08098	2.03e-58	up
SNORA6	0.159035	5.34114	33.5847	5.06973	0.0110379	up
SLC22A31	57.7143	147.848	2.56173	1.35712	4.06e-53	up
KLHL30	1.90272	5.28859	2.77949	1.47482	2.77e-17	up
GADD45A	42.9684	103.807	2.41588	1.27255	2.08e-22	up
AC000123.1	2.58475	7.62206	2.94885	1.56015	2.27e-05	up
TP53INP1	1.71712	11.267	6.56156	2.71404	3.81e-85	up
CALML6	3.8472	9.92983	2.58105	1.36796	1.04e-09	up
MIR22	0.211624	33.9054	160.215	7.32387	1.66e-10	up
AL031847.1	2.92123	6.4847	2.21986	1.15047	0.00657148	up
FBN1	50.1149	109.961	2.19418	1.13368	4.05e-81	up
RNF6	25.6726	52.0851	2.02882	1.02064	0.000425241	up
CXorf40A	15.0266	30.8793	2.05498	1.03913	2.39e-09	up
CDKN1A	75.8436	373.371	4.92291	2.29951	6.2e-134	up
CD44	60.9044	191.307	3.14109	1.65127	2.57e-65	up
AC092123.2	10.1211	20.9675	2.07166	1.05078	2.6e-35	up
TRIM22	1.13581	6.79133	5.9793	2.57998	1.71e-30	up
CES2	44.9488	94.3239	2.09847	1.06934	2.44e-46	up
ZNF530	3.9264	8.35898	2.12892	1.09012	8.52e-07	up
RPL23P2	2.36126	5.36814	2.27342	1.18486	0.00601572	up
AC097478.1	6.58015	13.3718	2.03214	1.023	7.57e-10	up
SESN1	7.09182	20.1507	2.8414	1.5066	1.05e-20	up
SPOCD1	10.0181	38.4521	3.83827	1.94045	1.73e-73	up
C1QTNF12	4.48009	24.9227	5.56298	2.47586	3.57e-22	up
FOSL1	47.9639	118.851	2.47793	1.30913	1.03e-21	up
AL157392.3	8.45115	23.9796	2.83743	1.50459	7.88e-10	up
TAGLN	9.25006	20.5022	2.21644	1.14824	1.63e-19	up
AL135999.1	3.95833	10.3859	2.62382	1.39167	6.65e-27	up
ADAMTS7	10.914	25.7238	2.35695	1.23692	2.61e-51	up
RENBP	8.64523	20.4395	2.36426	1.24139	9e-13	up
HHIPL2	4.98817	16.719	3.35174	1.74491	1.74e-38	up
ZNF451	26.1658	55.2091	2.10997	1.07722	1.33e-56	up
AC126696.2	6.17132	12.3802	2.00608	1.00438	0.000135928	up
LMF1	9.52694	19.4924	2.04603	1.03283	1.33e-20	up
RPS6KL1	3.54137	7.62874	2.15418	1.10714	4.12e-06	up
AP002992.1	3.6873	9.6321	2.61223	1.38528	9.34e-06	up
MDM2	19.9726	65.569	3.28294	1.71499	3.09e-99	up
TLCD1	27.23	58.324	2.1419	1.09889	9.54e-13	up
AL354740.1	3.54368	8.13409	2.29538	1.19873	0.0142322	up
QRICH2	4.36167	8.77776	2.01248	1.00897	5.65e-08	up
MIR1908	8.91224	20.0296	2.24743	1.16827	0.0144508	up
KIAA1324	2.34031	9.95665	4.25441	2.08896	3.45e-29	up
F3	94.1119	218.403	2.32068	1.21455	1.14e-76	up
CD68	11.2018	26.6732	2.38116	1.25167	1.25e-20	up
PARD6G	2.15937	5.00114	2.31601	1.21164	3.15e-15	up
SLC35E3	5.78876	12.0213	2.07666	1.05426	7.98e-29	up
AL031587.5	2.23167	5.23909	2.3476	1.23119	0.000576545	up
AC015813.6	3.53894	9.26254	2.61732	1.38809	1.73e-33	up
ELF3-AS1	15.4917	35.4457	2.28804	1.19411	2.71e-21	up
LIMK2	20.4318	43.1231	2.11058	1.07764	2.14e-18	up
ABLIM3	7.72449	16.8587	2.1825	1.12598	1.12e-10	up
OLFML2A	11.2171	23.8054	2.12225	1.08559	1.97e-33	up
AC119751.3	3.31246	18.6873	5.64152	2.49608	2.07e-21	up
CRISPLD2	2.16939	5.24651	2.41843	1.27407	4.71e-21	up
STX16-NPEPL1	6.56799	17.6482	2.68701	1.426	5.98e-10	up
PSORS1C1	28.6219	72.9529	2.54885	1.34985	1.25e-33	up
USP32P3	3.05836	7.84113	2.56384	1.35831	7.91e-07	up
VWA1	2.64566	5.84618	2.20973	1.14387	8.8e-05	up
ZNF440	2.40532	5.41138	2.24976	1.16977	9.87e-06	up
CR381653.2	8.28629	28.114	3.39284	1.76249	1.46e-27	up
S100A2	9.48701	19.6309	2.06924	1.0491	6.38e-09	up
ZDHHC11	7.56423	15.4621	2.04411	1.03147	1.15e-12	up
COL4A6	7.91236	18.0396	2.27993	1.18899	4.06e-38	up
FXYD3	14.7804	41.058	2.77787	1.47398	7.76e-28	up
AC135721.2	1.90712	6.31462	3.31108	1.7273	0.00210752	up
TNFRSF10A	11.4081	24.6531	2.16101	1.1117	1.8e-30	up
AC093495.1	3.35155	11.02	3.28804	1.71723	0.000138865	up
CHST3	50.6026	104.664	2.06836	1.04849	1.75e-104	up
ZNF841	7.88355	16.1116	2.0437	1.03119	2.31e-07	up
TMEM40	5.06855	18.3075	3.61198	1.85279	7.63e-39	up
ERO1B	2.62843	5.41696	2.06091	1.04328	1.01e-10	up
PROCR	33.7945	77.4259	2.29108	1.19603	2.59e-37	up
GIPR	3.42565	6.98801	2.0399	1.0285	0.000127596	up
KRT87P	1.73357	5.16048	2.9768	1.57376	1.36e-11	up
PPP2R5B	12.1184	29.0349	2.39595	1.2606	1.31e-53	up
METTL4	11.8631	26.7908	2.25834	1.17526	6.63e-10	up
ZMAT3	3.58361	17.1323	4.78075	2.25724	5.11e-133	up
TNFRSF10C	4.98095	18.7983	3.77403	1.91611	9.59e-41	up
MLPH	10.753	23.5066	2.18605	1.12833	7.65e-15	up
CSDC2	5.04937	13.7477	2.72265	1.44501	1.8e-33	up
SULF2	31.1746	72.9404	2.33974	1.22635	6.43e-61	up
PINLYP	2.55888	9.73132	3.80295	1.92712	2.22e-13	up
AC022167.2	4.66902	16.0878	3.44565	1.78478	6.87e-34	up
MYO7B	1.82216	5.00512	2.74681	1.45776	5.59e-12	up
DCBLD2	15.6297	39.79	2.5458	1.34812	1.49e-95	up
NAA30	6.94343	14.6755	2.11357	1.07968	3.35e-09	up
GGT4P	3.67793	8.30595	2.25832	1.17525	2.59e-10	up
TP53I3	14.627	42.9189	2.93423	1.55298	5.13e-46	up
AC092802.2	2.62684	7.63953	2.90826	1.54016	8.08e-05	up
ZNF814	4.74131	10.2582	2.16359	1.11343	7.72e-05	up
AC006262.2	2.28999	10.4135	4.54743	2.18505	8.67e-07	up
KLF7	3.53982	7.31531	2.06658	1.04724	3.02e-12	up
HAS3	2.51549	6.75771	2.68644	1.42569	0.00229089	up
SH3BGRL3	108.512	255.32	2.35292	1.23445	4.98e-77	up
LIMA1	51.5076	135.849	2.63745	1.39914	1.03e-23	up
B4GALT4	22.9819	49.6764	2.16154	1.11206	4.41e-07	up
IL11	5.40102	10.8571	2.01019	1.00733	5.01e-10	up
CFAP161	0.0765873	7.15652	93.4426	6.54601	4.75e-21	up
ZNF513	6.36693	18.3122	2.87615	1.52414	1.24e-35	up
DKK1	79.1828	172.476	2.1782	1.12314	8.23e-75	up
MT-TD	44.8493	95.6065	2.13173	1.09202	2.44e-06	up
AC107959.1	0.836713	21.9526	26.2367	4.71352	6.03e-14	up
AC008536.1	2.12896	8.63439	4.05568	2.01994	1.64e-06	up
AVIL	2.52312	10.9174	4.32694	2.11335	3.29e-25	up
ANKRD50	3.12917	7.13685	2.28075	1.18951	1.12e-26	up
AC055811.1	1.3704	5.06214	3.69392	1.88515	1.75e-11	up
ZSCAN2	4.88404	9.99593	2.04665	1.03326	6.12e-06	up
CD101	0.779969	6.00017	7.69284	2.94352	1.15e-19	up
CEACAM19	6.32184	16.9656	2.68365	1.4242	9.6e-30	up
AC005840.3	1.87044	5.60093	2.99443	1.58228	3.19e-13	up
AC087380.1	5.72557	12.9501	2.2618	1.17747	3.23e-07	up
YPEL3	13.186	34.3213	2.60286	1.3801	4.89e-19	up
CYSRT1	36.5244	132.667	3.63227	1.86087	7.54e-97	up
POLH	20.5517	42.4655	2.06628	1.04703	5.25e-56	up
AC010733.1	2.54206	5.23454	2.05917	1.04207	0.0113381	up
SMPD1	18.4873	45.7989	2.47732	1.30878	2.57e-21	up
GNB3	7.85566	20.2538	2.57825	1.36639	2.97e-19	up
PDE6G	0.941595	5.46624	5.8053	2.53737	2.92e-12	up
CXorf23	4.83701	10.0898	2.08595	1.06071	4.95e-07	up
SPHK1	27.733	66.1009	2.38348	1.25307	4.2e-12	up
CALHM2	3.50814	8.5329	2.43232	1.28233	4.99e-07	up
SMG1P7	5.871	14.5875	2.48467	1.31306	3.73e-19	up
AC004520.1	15.2189	44.5415	2.92673	1.54929	5.36e-44	up
NECTIN4	2.00031	22.937	11.4667	3.51938	6.31e-55	up
NLRP1	9.78365	20.7205	2.11787	1.08262	5.68e-33	up
SEC61A1	206.859	434.142	2.09873	1.06952	0.00208511	up
TUBGCP6	16.9123	36.5402	2.16057	1.11141	8.63e-25	up
RAET1G	3.67476	9.28832	2.5276	1.33777	8.69e-06	up
LINC01759	2.81938	14.2996	5.0719	2.34253	9.43e-22	up
CSF1	9.08366	20.2662	2.23106	1.15773	5.73e-41	up
DCUN1D3	4.51749	9.64088	2.13412	1.09364	3.36e-08	up
CYGB	2.72324	11.7173	4.30271	2.10525	1.31e-06	up
PLCXD2	2.0085	5.52864	2.75262	1.46081	9.17e-35	up
TM4SF19	3.08027	6.68704	2.17093	1.11831	6.73e-06	up
TSPAN1	7.20209	15.7068	2.18087	1.1249	1.34e-07	up
LINC00958	52.4825	105.128	2.0031	1.00224	2.29e-26	up
AC025165.5	2.47926	5.28802	2.13291	1.09282	0.00108751	up
BBC3	11.4321	31.0869	2.71926	1.44321	2.7e-24	up
ANTXR2	2.84717	7.12344	2.50193	1.32304	3.14e-35	up
BTG2	16.0704	47.6434	2.96467	1.56787	6.76e-105	up
SPINK6	2.49348	5.54443	2.22357	1.15288	0.000891519	up
AL512785.2	8.1652	18.4558	2.2603	1.17652	5.43e-06	up
GPR75-ASB3	1.47943	5.80729	3.92536	1.97282	0.00892919	up
ZFYVE1	5.3993	10.9059	2.01987	1.01426	3.9e-12	up
TNFSF9	38.2969	82.1939	2.14623	1.1018	1.07e-61	up
CRYBG3	4.8164	9.96517	2.06901	1.04894	2.79e-31	up
MICAL2	16.4451	41.5825	2.52856	1.33831	1.02e-46	up
RAB27B	12.6962	27.4543	2.1624	1.11264	7.89e-40	up
NBPF4	4.00973	9.16493	2.28567	1.19262	1.5e-18	up
MMP19	7.16368	14.748	2.05872	1.04175	2.13e-12	up
S100A3	15.8363	51.6234	3.2598	1.70479	7.92e-35	up
HOXA11-AS1_3	0.304263	10.7814	35.4345	5.14708	0.000856451	up
LZTS3	2.74107	6.0272	2.19885	1.13675	6.78e-11	up
TXNIP	61.7321	123.584	2.00195	1.0014	3.44e-61	up
WFIKKN1	3.14276	16.0727	5.1142	2.35451	3.55e-89	up
AC092118.1	2.69998	5.5345	2.04983	1.0355	0.00141486	up
TMEM217	2.55356	17.9745	7.039	2.81537	1.19e-30	up
PSG2	1.78192	5.87351	3.29617	1.72079	2.32e-07	up
TSPAN10	20.5216	51.1265	2.49135	1.31693	1.07e-34	up
CRYAB	5.72567	13.4536	2.3497	1.23248	2.33e-08	up
AC010457.1	49.8186	148.219	2.97518	1.57298	2.34e-30	up
GNB1L	6.70767	13.8159	2.05971	1.04244	9.06e-14	up
FAM71F2	1.17897	12.6182	10.7027	3.4199	7.8e-30	up
RRM2B	10.9258	27.3274	2.50118	1.32261	9.8e-55	up
ARVCF	4.42517	10.4211	2.35496	1.2357	1.92e-14	up
EDA2R	1.73504	6.09428	3.51246	1.81248	1.21e-05	up
NKAIN4	6.69752	28.3246	4.22912	2.08036	9.93e-28	up
BIRC7	42.095	96.5484	2.29358	1.1976	1.78e-54	up
FDXR	23.4878	54.1075	2.30364	1.20392	9.86e-51	up
LARP6	5.63984	16.7292	2.96626	1.56864	8.02e-14	up
AC073610.3	2.67989	5.88705	2.19676	1.13537	0.000206617	up
OAZ3	2.79182	5.74274	2.05698	1.04053	0.00213003	up
